# Supplementary material
Source: PubMed Central journal article supplement (PMC2948839)

Supplemental Figure 2: Kaplan-Meier survival plot for age of onset of ESRD for rs526906, rs525014, and rs571118. The dark circles represent individuals homozygous for the protective allele, and white circle represent individuals who are homozygous or heterozygous for the alternative allele.

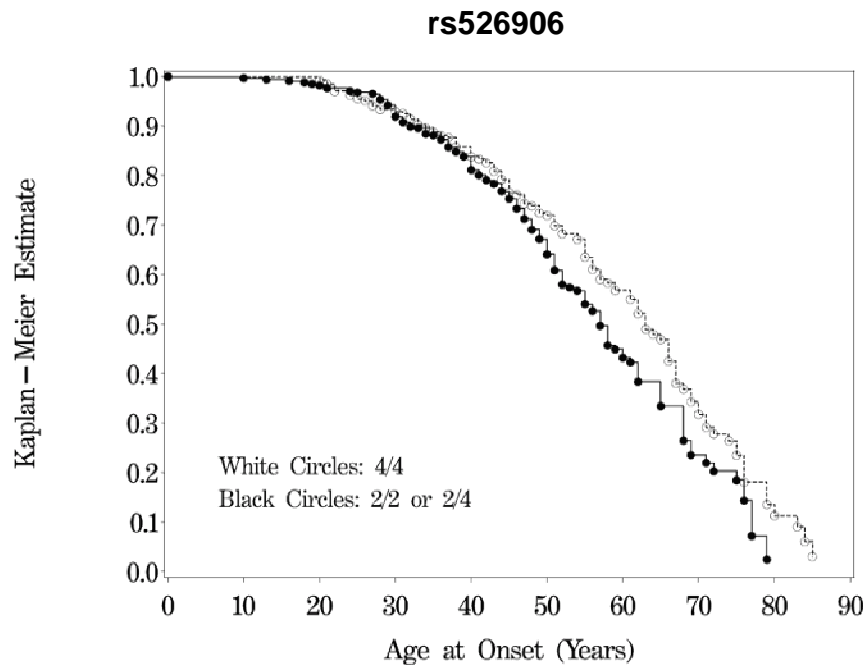

rs525014

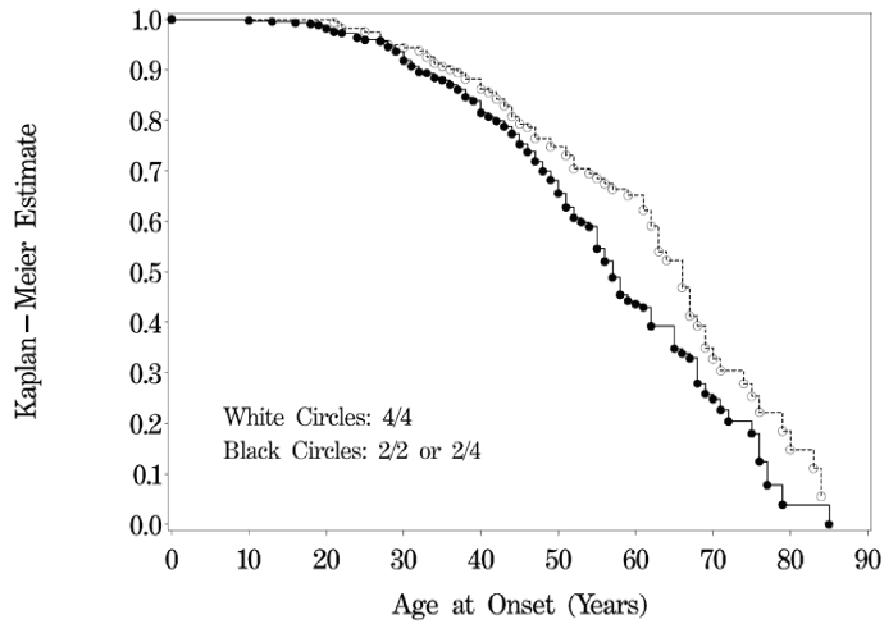

rs571118

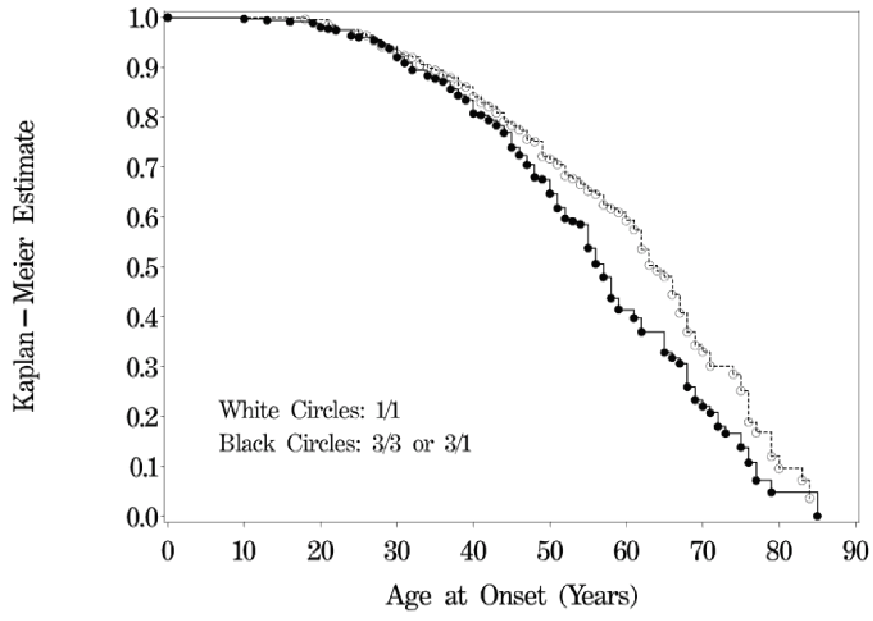

Supplemental Figure 3: Relative *klotho* mRNA expression for the 60 unrelated individuals from the Yoruba people of Ibadan, Nigeria. Individuals who are homozygous T/T/A for the three SNP haplotype (rs526906, rs525014, and rs571118) are shown compared to all other individuals (\*  $p=0.003$ ). Data is normalized from Illumina BeadStudio (Illumina Inc, San Diego, CA) output as described in (17).

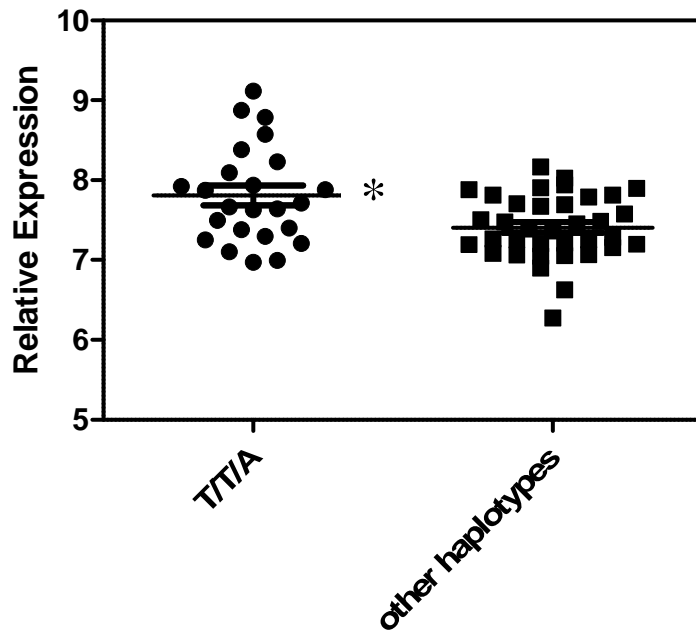

Supplement: supp_gfq214_gfq214_suppl.pdf [file supp_gfq214_gfq214_suppl.pdf]
